# Supplementary material
Source: PubMed Central journal article supplement (PMC10090804)
Supplement: mmc2.pdf [file mmc2.pdf]

## **Supplemental Tables**

Supplemental Table 1: The International Classification of Diseases, Tenth Revision, Clinical Modification (ICD-10-CM) and Ninth Revision, Clinical Modification (ICD-9-CM) codes used to identify diabetes mellitus in the electronic health record (EHR).

| ICD-10* | ICD-9*                                            |
|---------|---------------------------------------------------|
| E08     | 250                                               |
| E09     | 362.01, 362.02, 362.03,<br>362.04, 362.05, 362.06 |
| E10     | 362.07                                            |
| E11     | 361.81                                            |
| E13     |                                                   |

\*Any codes that started with the following

Supplemental Table 2: Thresholds for defining what is considered a lapse in diabetic retinopathy care. Definitions are based on the providers' recommended follow-up timeframe and are compared to the patient's actual time to the next office visit.

| Recommended follow-up | Not returning within | Time to the next office visit |
|-----------------------|----------------------|-------------------------------|
| ≤8 weeks              | 2 weeks              | ≥10 weeks                     |
| >8 to ≤20 weeks       | 4 weeks              | ≥24 weeks                     |
| >20 to ≤32 weeks      | 8 weeks              | ≥40 weeks                     |
| >32 to ≤52 weeks      | 12 weeks             | ≥64 weeks                     |

Supplemental Table 3: The International Classification of Diseases, Tenth Revision, Clinical Modification (ICD-10-CM) and Ninth Revision, Clinical Modification (ICD-9-CM) codes used to identify the severity of diabetic retinopathy, other retinal disorders, and other major eye diseases.

|                                               | ICD-10*                                                                                                                                                                                                                       | ICD-9*                                         |
|-----------------------------------------------|-------------------------------------------------------------------------------------------------------------------------------------------------------------------------------------------------------------------------------|------------------------------------------------|
| Diabetic Retinopathy (DR)                     |                                                                                                                                                                                                                               |                                                |
| Non-proliferative diabetic retinopathy (NPDR) | E08.31, E08.32, E08.33,<br>E08.34, E08.37<br>E09.31, E09.32, E09.33,<br>E09.34, E09.37<br>E10.31, E10.32, E10.33,<br>E10.34, E10.37<br>E11.31, E11.32, E11.33,<br>E11.34, E11.37<br>E13.31, E13.32, E13.33,<br>E13.34, E13.37 | 362.01<br>362.03<br>362.04<br>362.05<br>362.06 |
| Proliferative diabetic retinopathy (PDR)      | E08.35<br>E09.35<br>E10.35<br>E11.35<br>E13.35                                                                                                                                                                                | 362.02<br>361.81                               |
| Other retinal disorders                       |                                                                                                                                                                                                                               |                                                |

|                                        |                  |                                                |
|----------------------------------------|------------------|------------------------------------------------|
| Age related macular degeneration (AMD) | H35.31<br>H35.32 | 362.51<br>362.52<br>362.50<br>362.57           |
| Vein occlusion (VO)                    | H34              | 362.30<br>362.35<br>362.36<br>362.37           |
| Artery occlusion (AO)                  | H34              | 362.30<br>362.31<br>362.32<br>362.33<br>362.34 |
| Other major eye diseases               |                  |                                                |
| Glaucoma                               | H40<br>H42       | 362                                            |

\*Any codes that started with the following

Supplemental Table 7: Demographic characteristics of patients with diabetes mellitus seen in the ophthalmology department for diabetic retinopathy screening or treatment stratified by the number of office visits in the two-year observation window.

|                           | Office Visits: 1<br>N=17883 (%) | Office Visits: 2+<br>N=21678 (%) | P-value |
|---------------------------|---------------------------------|----------------------------------|---------|
| Age (years),<br>mean (SD) | 60.1 (14.0)                     | 62.5 (12.9)                      | <0.001  |
| ≤20                       | 70 (0.4)                        | 34 (0.2)                         | <0.001  |
| >20 to ≤45                | 2564 (14.3)                     | 2133 (9.8)                       |         |
| >45 to ≤65                | 8822 (49.3)                     | 10058 (46.4)                     |         |
| >65                       | 6427 (35.9)                     | 9453 (43.6)                      |         |
| Sex                       |                                 |                                  | 0.956   |
| Female                    | 9331 (52.2)                     | 11304 (52.1)                     |         |
| Male                      | 8552 (47.8)                     | 10374 (47.9)                     |         |
| Race and<br>Ethnicity     |                                 |                                  | <0.001  |
| Non-<br>Hispanic<br>White | 7794 (43.6)                     | 10771 (49.7)                     |         |
| Non-<br>Hispanic<br>Black | 6842 (38.3)                     | 7660 (35.3)                      |         |
| Hispanic                  | 940 (5.3)                       | 972 (4.5)                        |         |
| Other                     | 2307 (12.9)                     | 2275 (10.5)                      |         |
| Insurance                 |                                 |                                  | <0.001  |
| Private                   | 6824 (39.2)                     | 8014 (37.2)                      |         |
| Medicare                  | 6592 (37.8)                     | 9102 (42.3)                      |         |

|                                               |              |              |        |
|-----------------------------------------------|--------------|--------------|--------|
| Medicaid                                      | 2237 (12.8)  | 1977 (9.2)   |        |
| Other                                         | 1226 (7.0)   | 1938 (9.0)   |        |
| None                                          | 539 (3.1)    | 506 (2.3)    |        |
| Diabetic Retinopathy (DR)                     |              |              | <0.001 |
| No DR                                         | 15430 (86.3) | 15901 (73.4) |        |
| Non-proliferative diabetic retinopathy (NPDR) | 1981 (11.1)  | 3976 (18.3)  |        |
| Proliferative diabetic retinopathy (PDR)      | 472 (2.6)    | 1801 (8.3)   |        |
| Other retinal disorders                       |              |              | <0.001 |
| Absent                                        | 17300 (96.7) | 20580 (94.9) |        |
| Present                                       | 583 (3.3)    | 1098 (5.1)   |        |
| Glaucoma                                      |              |              | 0.170  |
| Absent                                        | 15117 (84.5) | 18434 (85.0) |        |
| Present                                       | 2766 (15.5)  | 3244 (15.0)  |        |

\*Standard deviation

Supplemental Table 9: Proportion of office visits considered to have lapses in diabetic retinopathy care stratified by recommended follow-up time among patients entering the cohort from 2016-2017, results from the sensitivity analysis.

| Recommended follow-up timeframe by the provider | Total number of office visits | Proportion of office visits with lapses in care |
|-------------------------------------------------|-------------------------------|-------------------------------------------------|
| ≤8 weeks                                        | 6,163                         | 30.3%                                           |
| >8 to ≤20 weeks                                 | 2,128                         | 43.9%                                           |
| >20 to ≤32 weeks                                | 2,334                         | 43.1%                                           |
| >32 to ≤52 weeks                                | 11,060                        | 43.4%                                           |

Supplemental Table 10: Adjusted odds ratio (OR) of having a lapse in diabetic retinopathy care among patients entering the cohort from 2016-2017, results from the sensitivity analysis.

|             | Ever have a lapse in care<br>N (%) | Adjusted Odds Ratio*<br>(95% Confidence Interval) | P-value |
|-------------|------------------------------------|---------------------------------------------------|---------|
| Age (years) |                                    |                                                   |         |
| ≤20         | 18 (81.8)                          | (reference)                                       |         |
| >20 to ≤45  | 1099 (85.2)                        | 0.73 (0.27, 2.01)                                 | 0.544   |
| >45 to ≤65  | 3742 (79.9)                        | 0.52 (0.19, 1.41)                                 | 0.196   |

|                                               |             |                   |        |
|-----------------------------------------------|-------------|-------------------|--------|
| >65                                           | 2882 (74.4) | 0.42 (0.15, 1.15) | 0.092  |
| Sex                                           |             |                   |        |
| Female                                        | 4005 (79.6) | (reference)       |        |
| Male                                          | 3736 (77.3) | 0.93 (0.86, 1.01) | 0.091  |
| Race and Ethnicity                            |             |                   |        |
| Non-Hispanic White                            | 3326 (73.5) | (reference)       |        |
| Non-Hispanic Black                            | 2942 (83.8) | 1.35 (1.23, 1.48) | <0.001 |
| Hispanic                                      | 431 (81.5)  | 1.18 (0.97, 1.43) | 0.099  |
| Other                                         | 1042 (80.1) | 1.22 (1.08, 1.38) | 0.001  |
| Insurance                                     |             |                   |        |
| Private                                       | 3078 (78.7) | (reference)       |        |
| Medicare                                      | 2884 (75.5) | 0.96 (0.87, 1.07) | 0.448  |
| Medicaid                                      | 982 (88.1)  | 1.22 (1.07, 1.4)  | 0.003  |
| Other                                         | 470 (73.2)  | 0.9 (0.76, 1.06)  | 0.204  |
| None                                          | 276 (83.1)  | 1.34 (1.04, 1.72) | 0.021  |
| Diabetic Retinopathy (DR)                     |             |                   |        |
| No DR                                         | 6195 (76.6) | (reference)       |        |
| Non-proliferative diabetic retinopathy (NPDR) | 1158 (84.6) | 0.51 (0.46, 0.56) | <0.001 |
| Proliferative diabetic retinopathy (PDR)      | 388 (94.9)  | 0.35 (0.31, 0.4)  | <0.001 |
| Other retinal disorders                       |             |                   |        |
| Absent                                        | 7393 (78.4) | (reference)       |        |
| Present                                       | 348 (79.6)  | 0.78 (0.66, 0.91) | 0.002  |
| Glaucoma                                      |             |                   |        |
| Absent                                        | 6405 (77.6) | (reference)       |        |
| Present                                       | 1336 (83)   | 1.22 (1.1, 1.34)  | <0.001 |

\* Marginal odds ratios are presented
